# Supplementary material
Source: PubMed Central journal article supplement (PMC3409442)

Merge  
Basal Cell Keratin  
Total H3  
DAPI

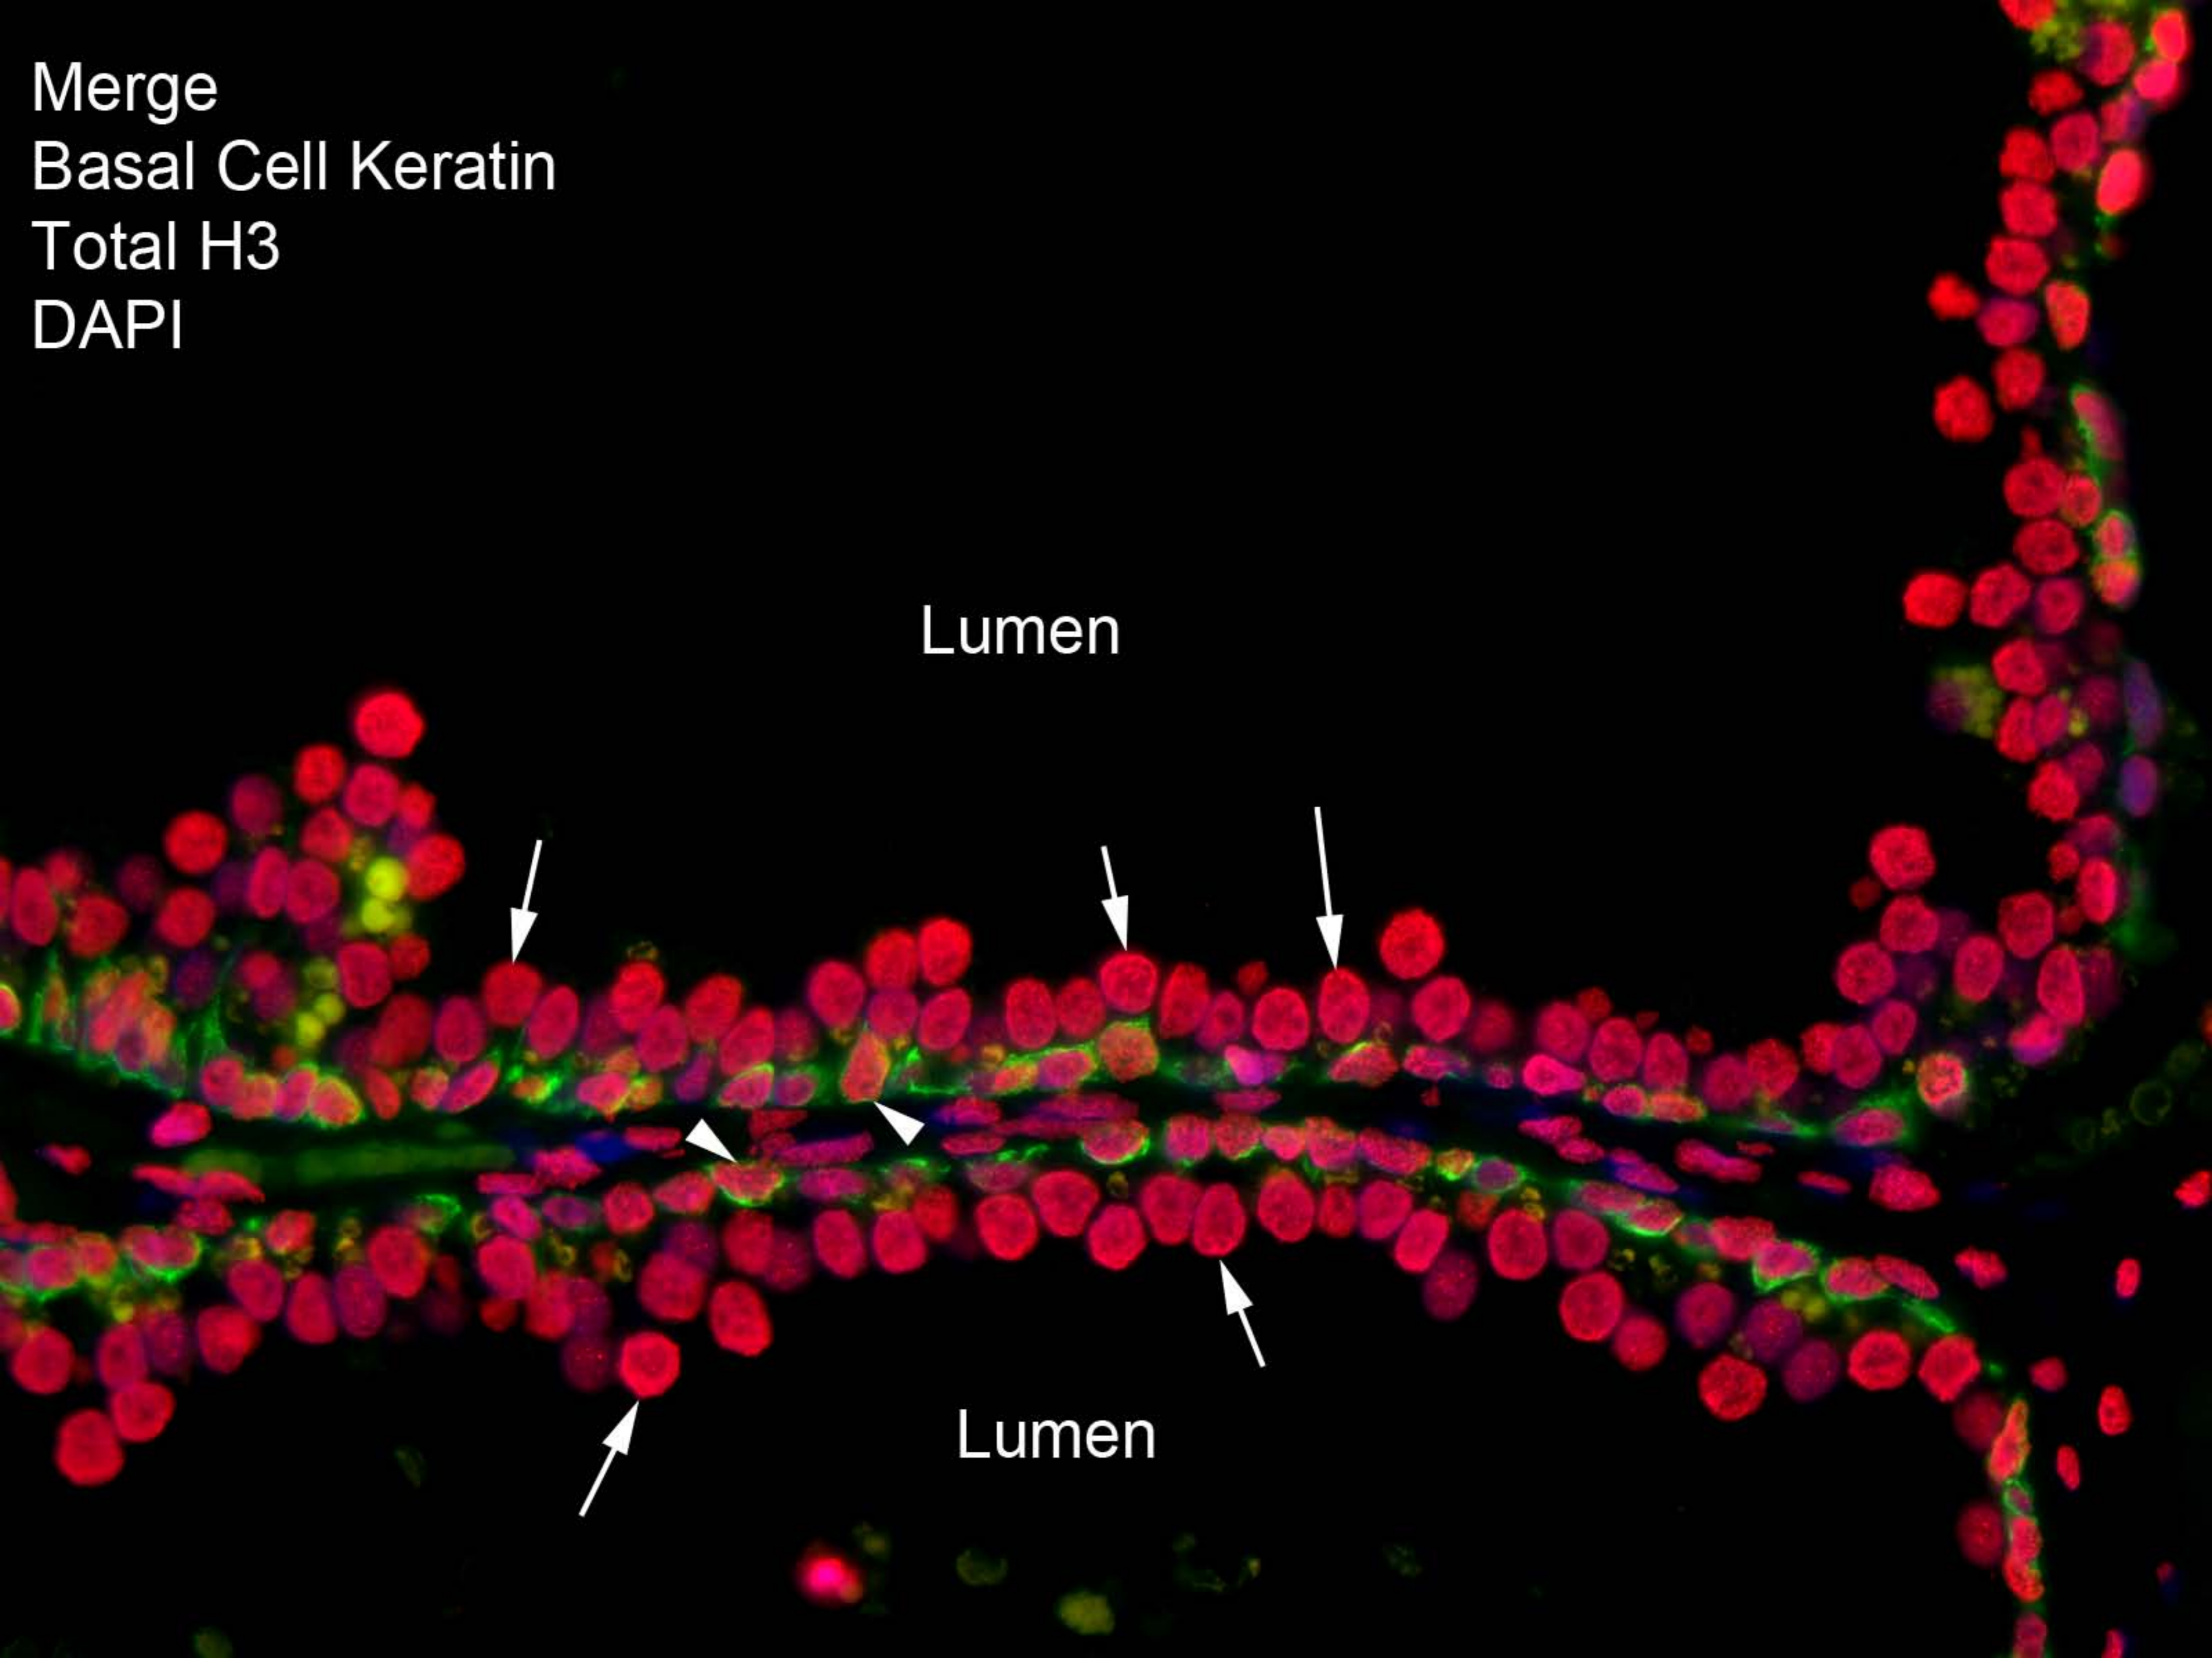

Supplement: mmc1.pdf [file mmc1.pdf]

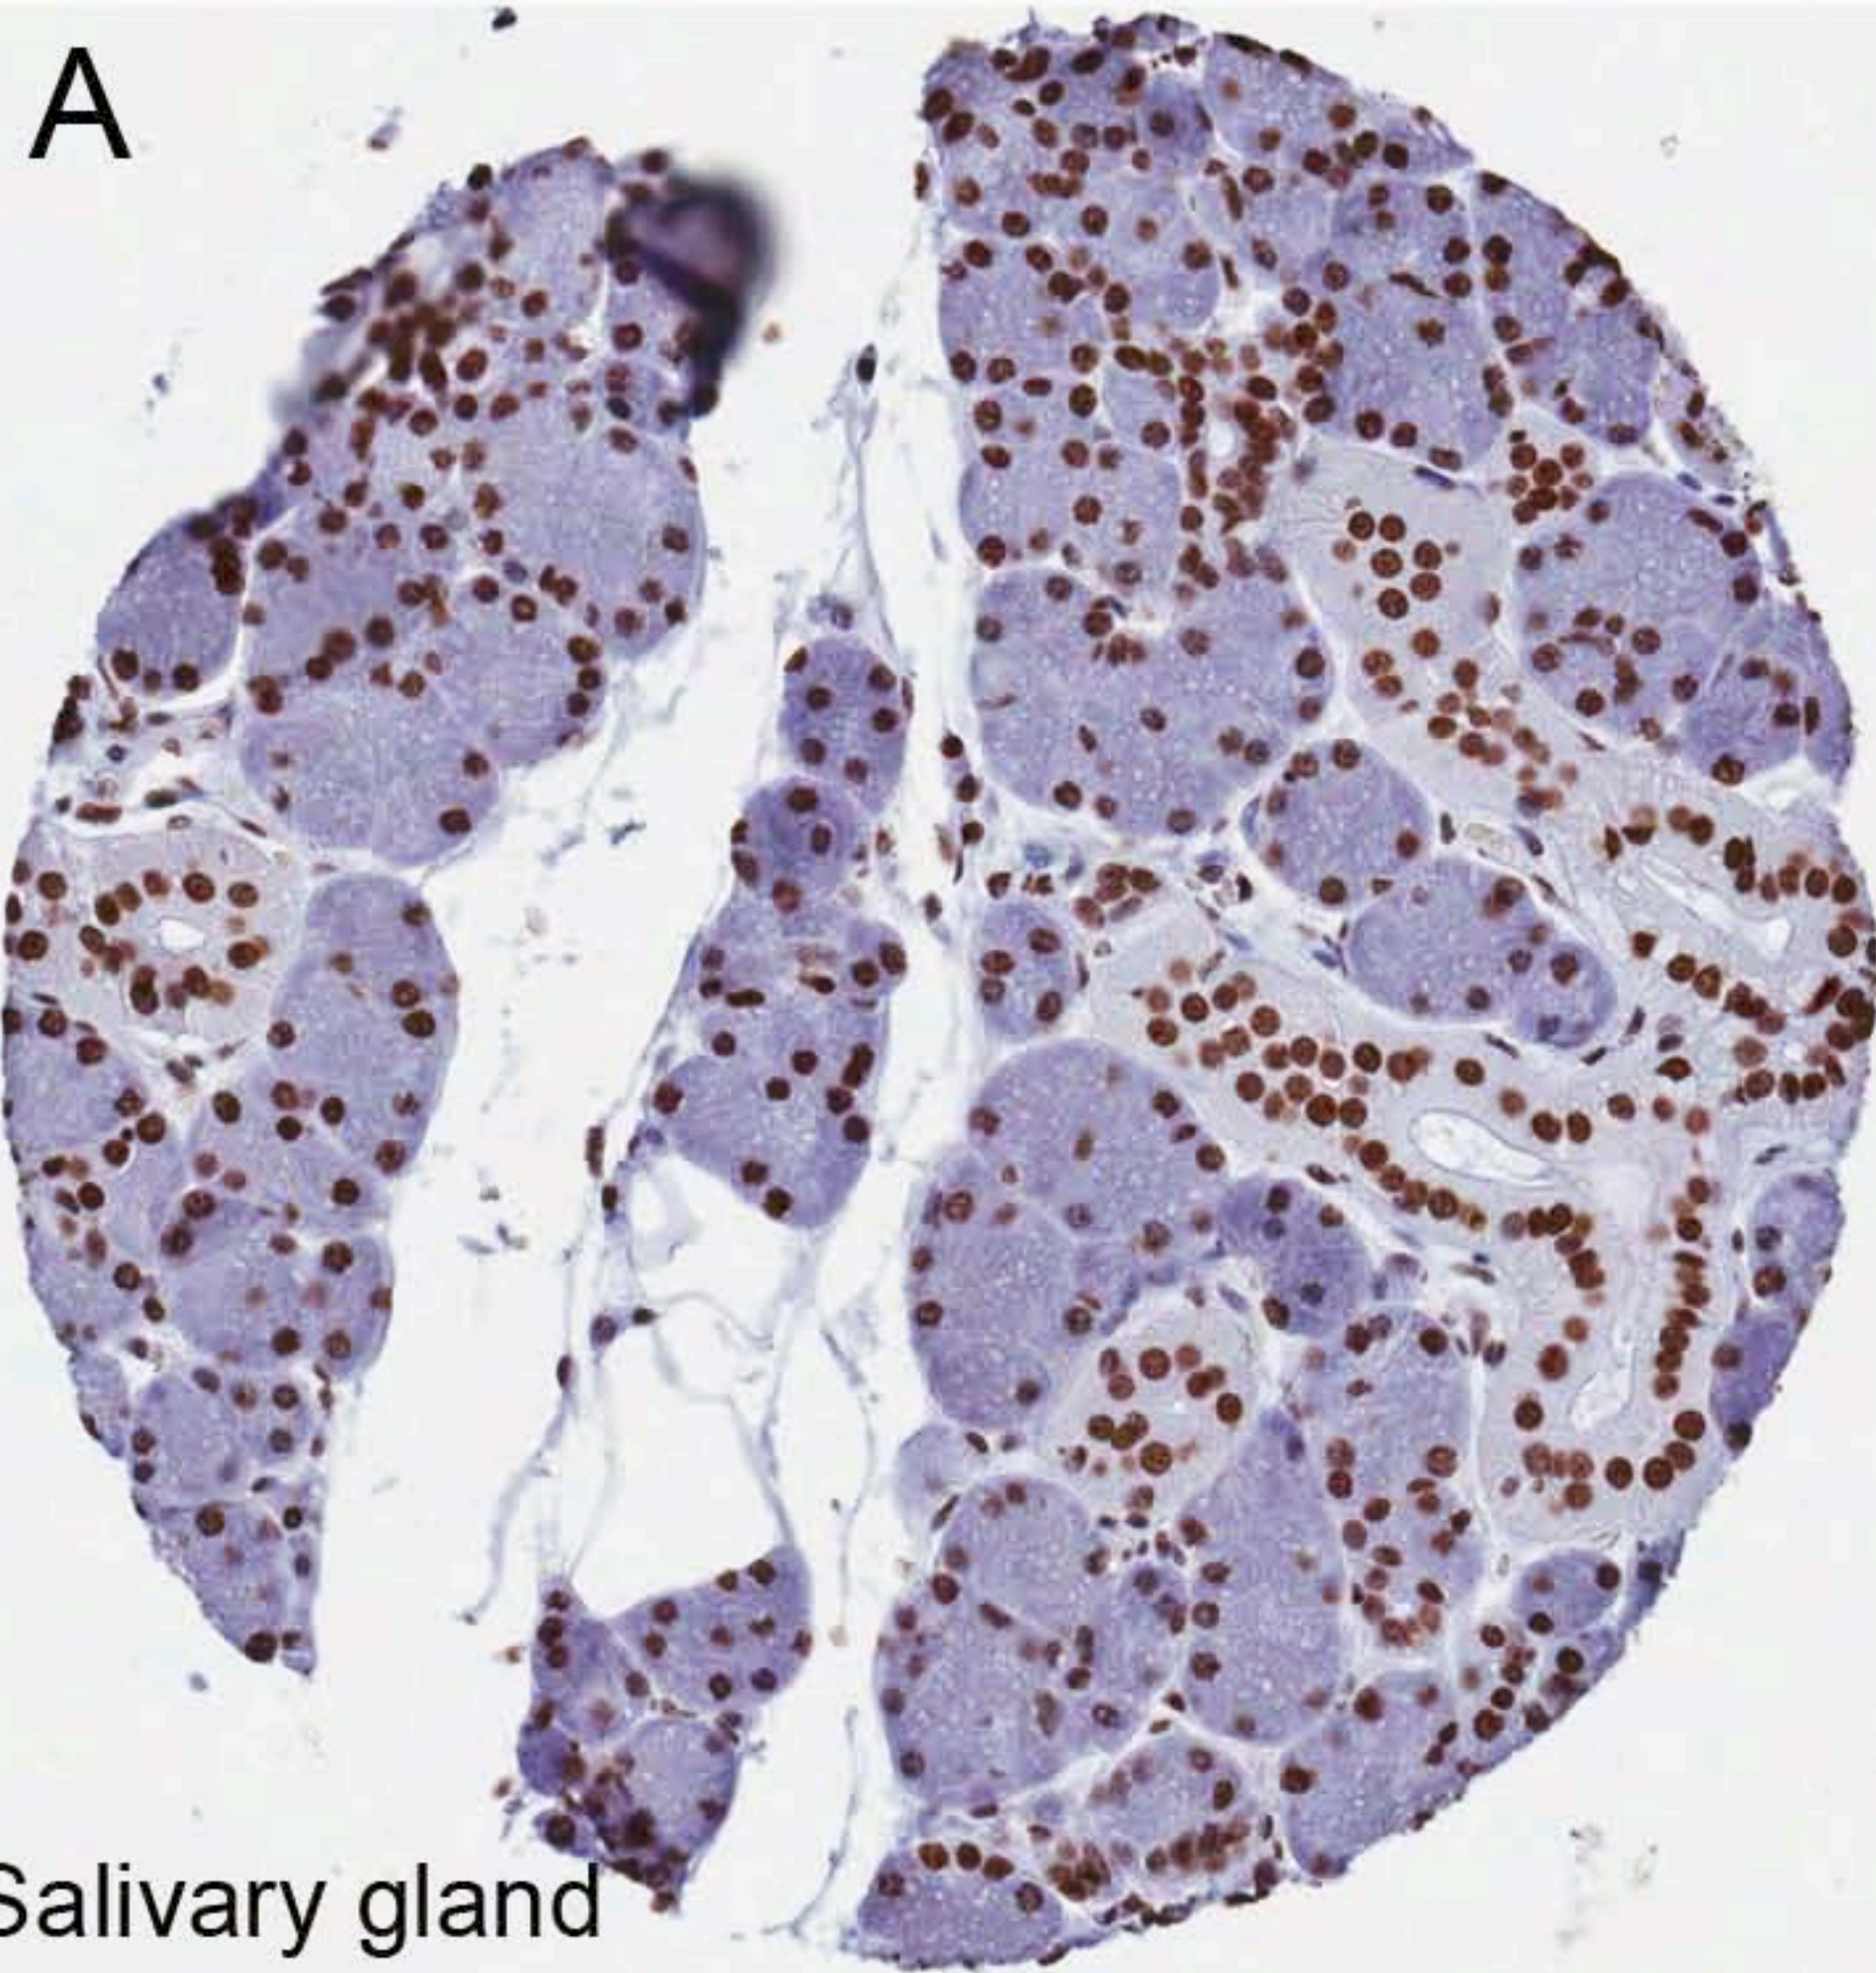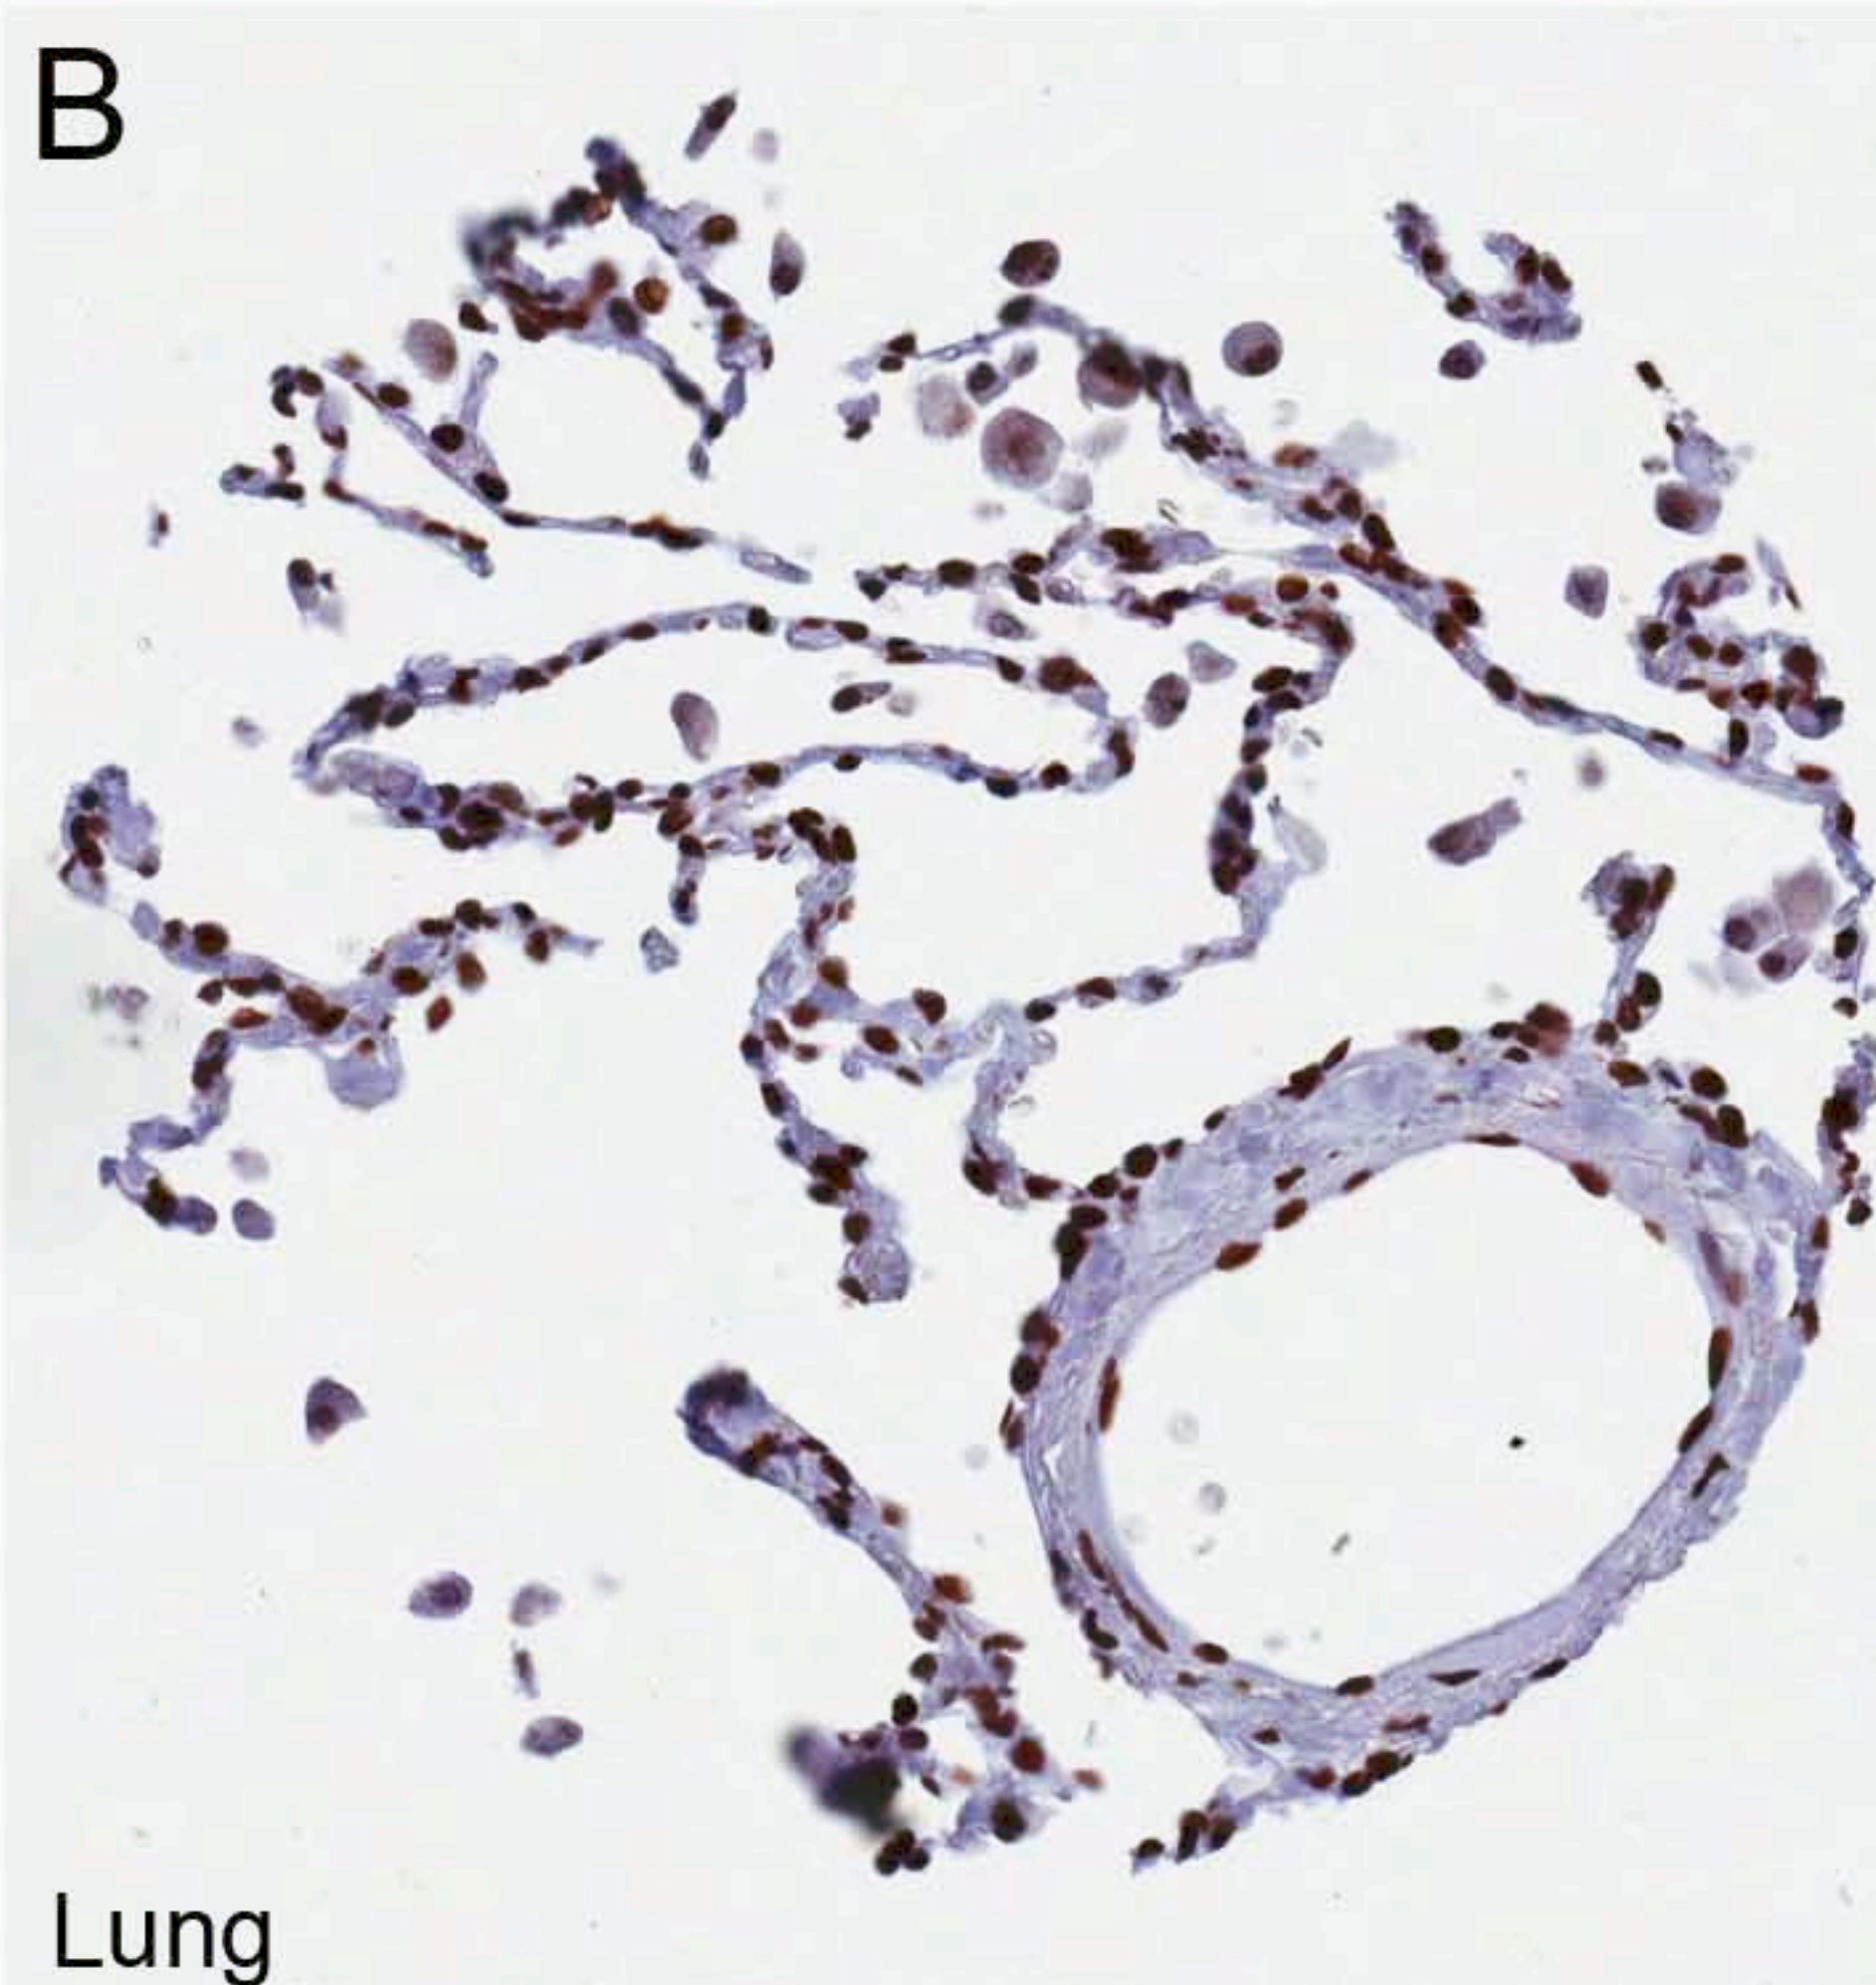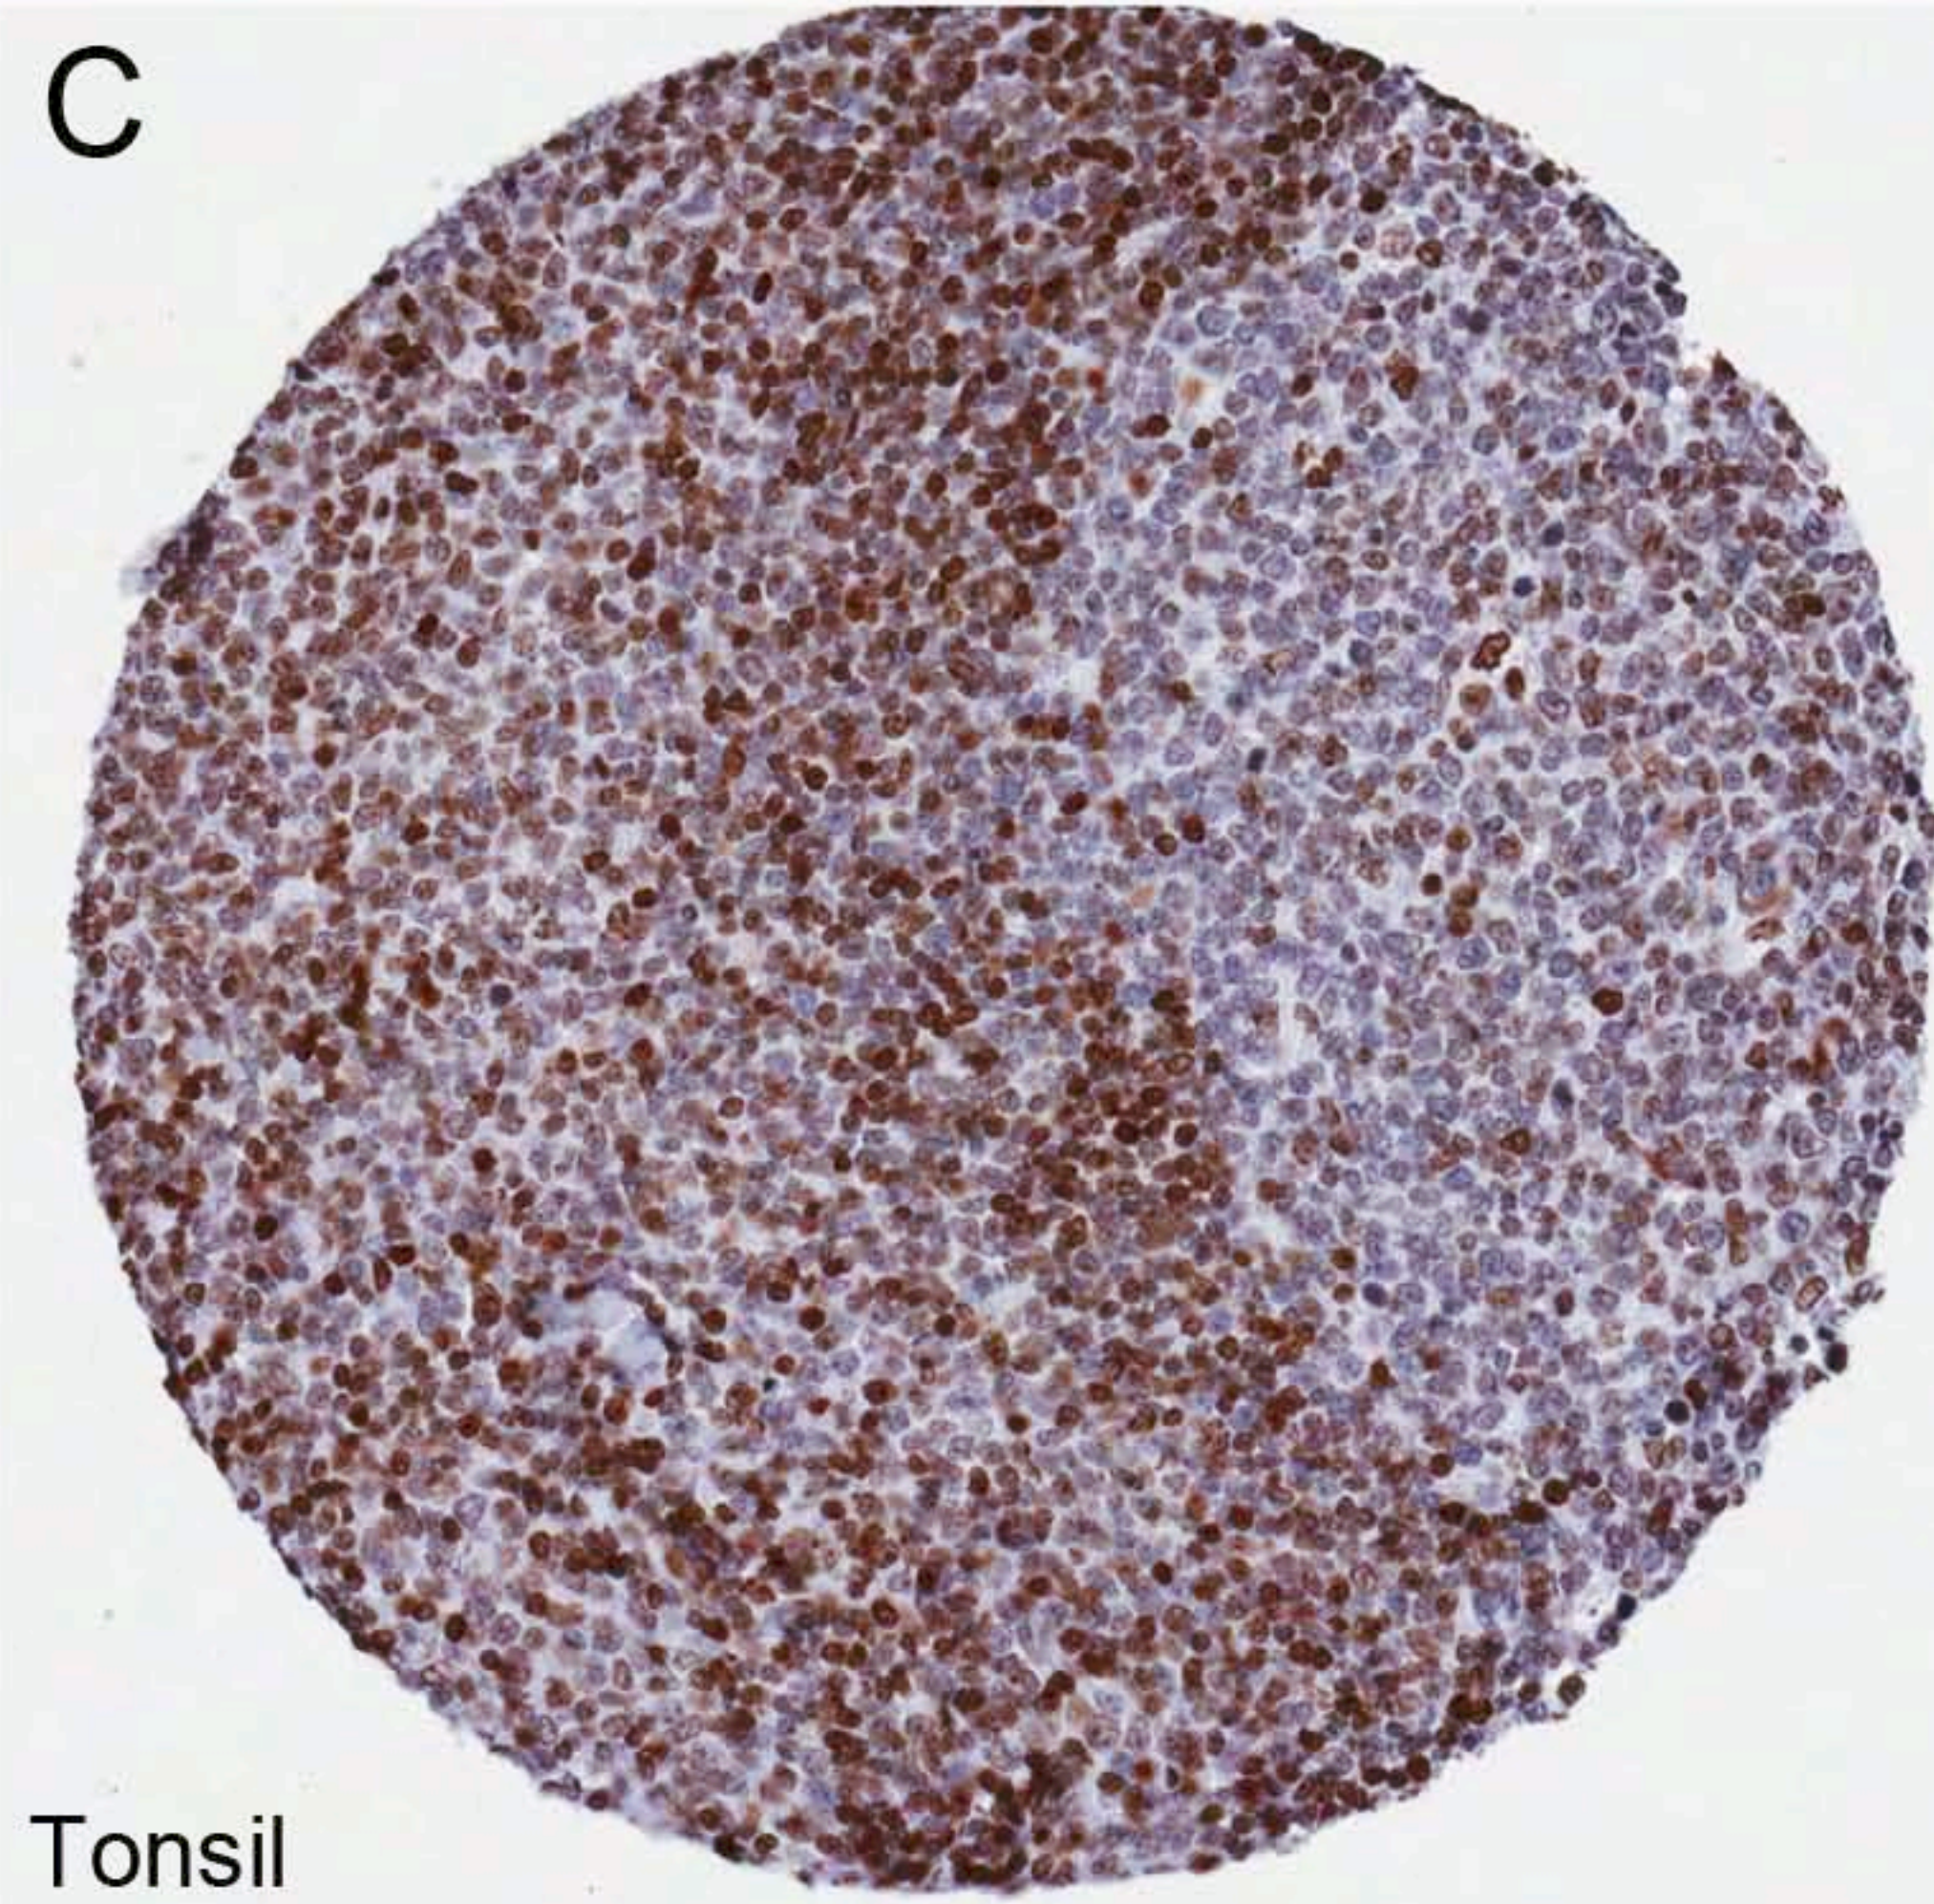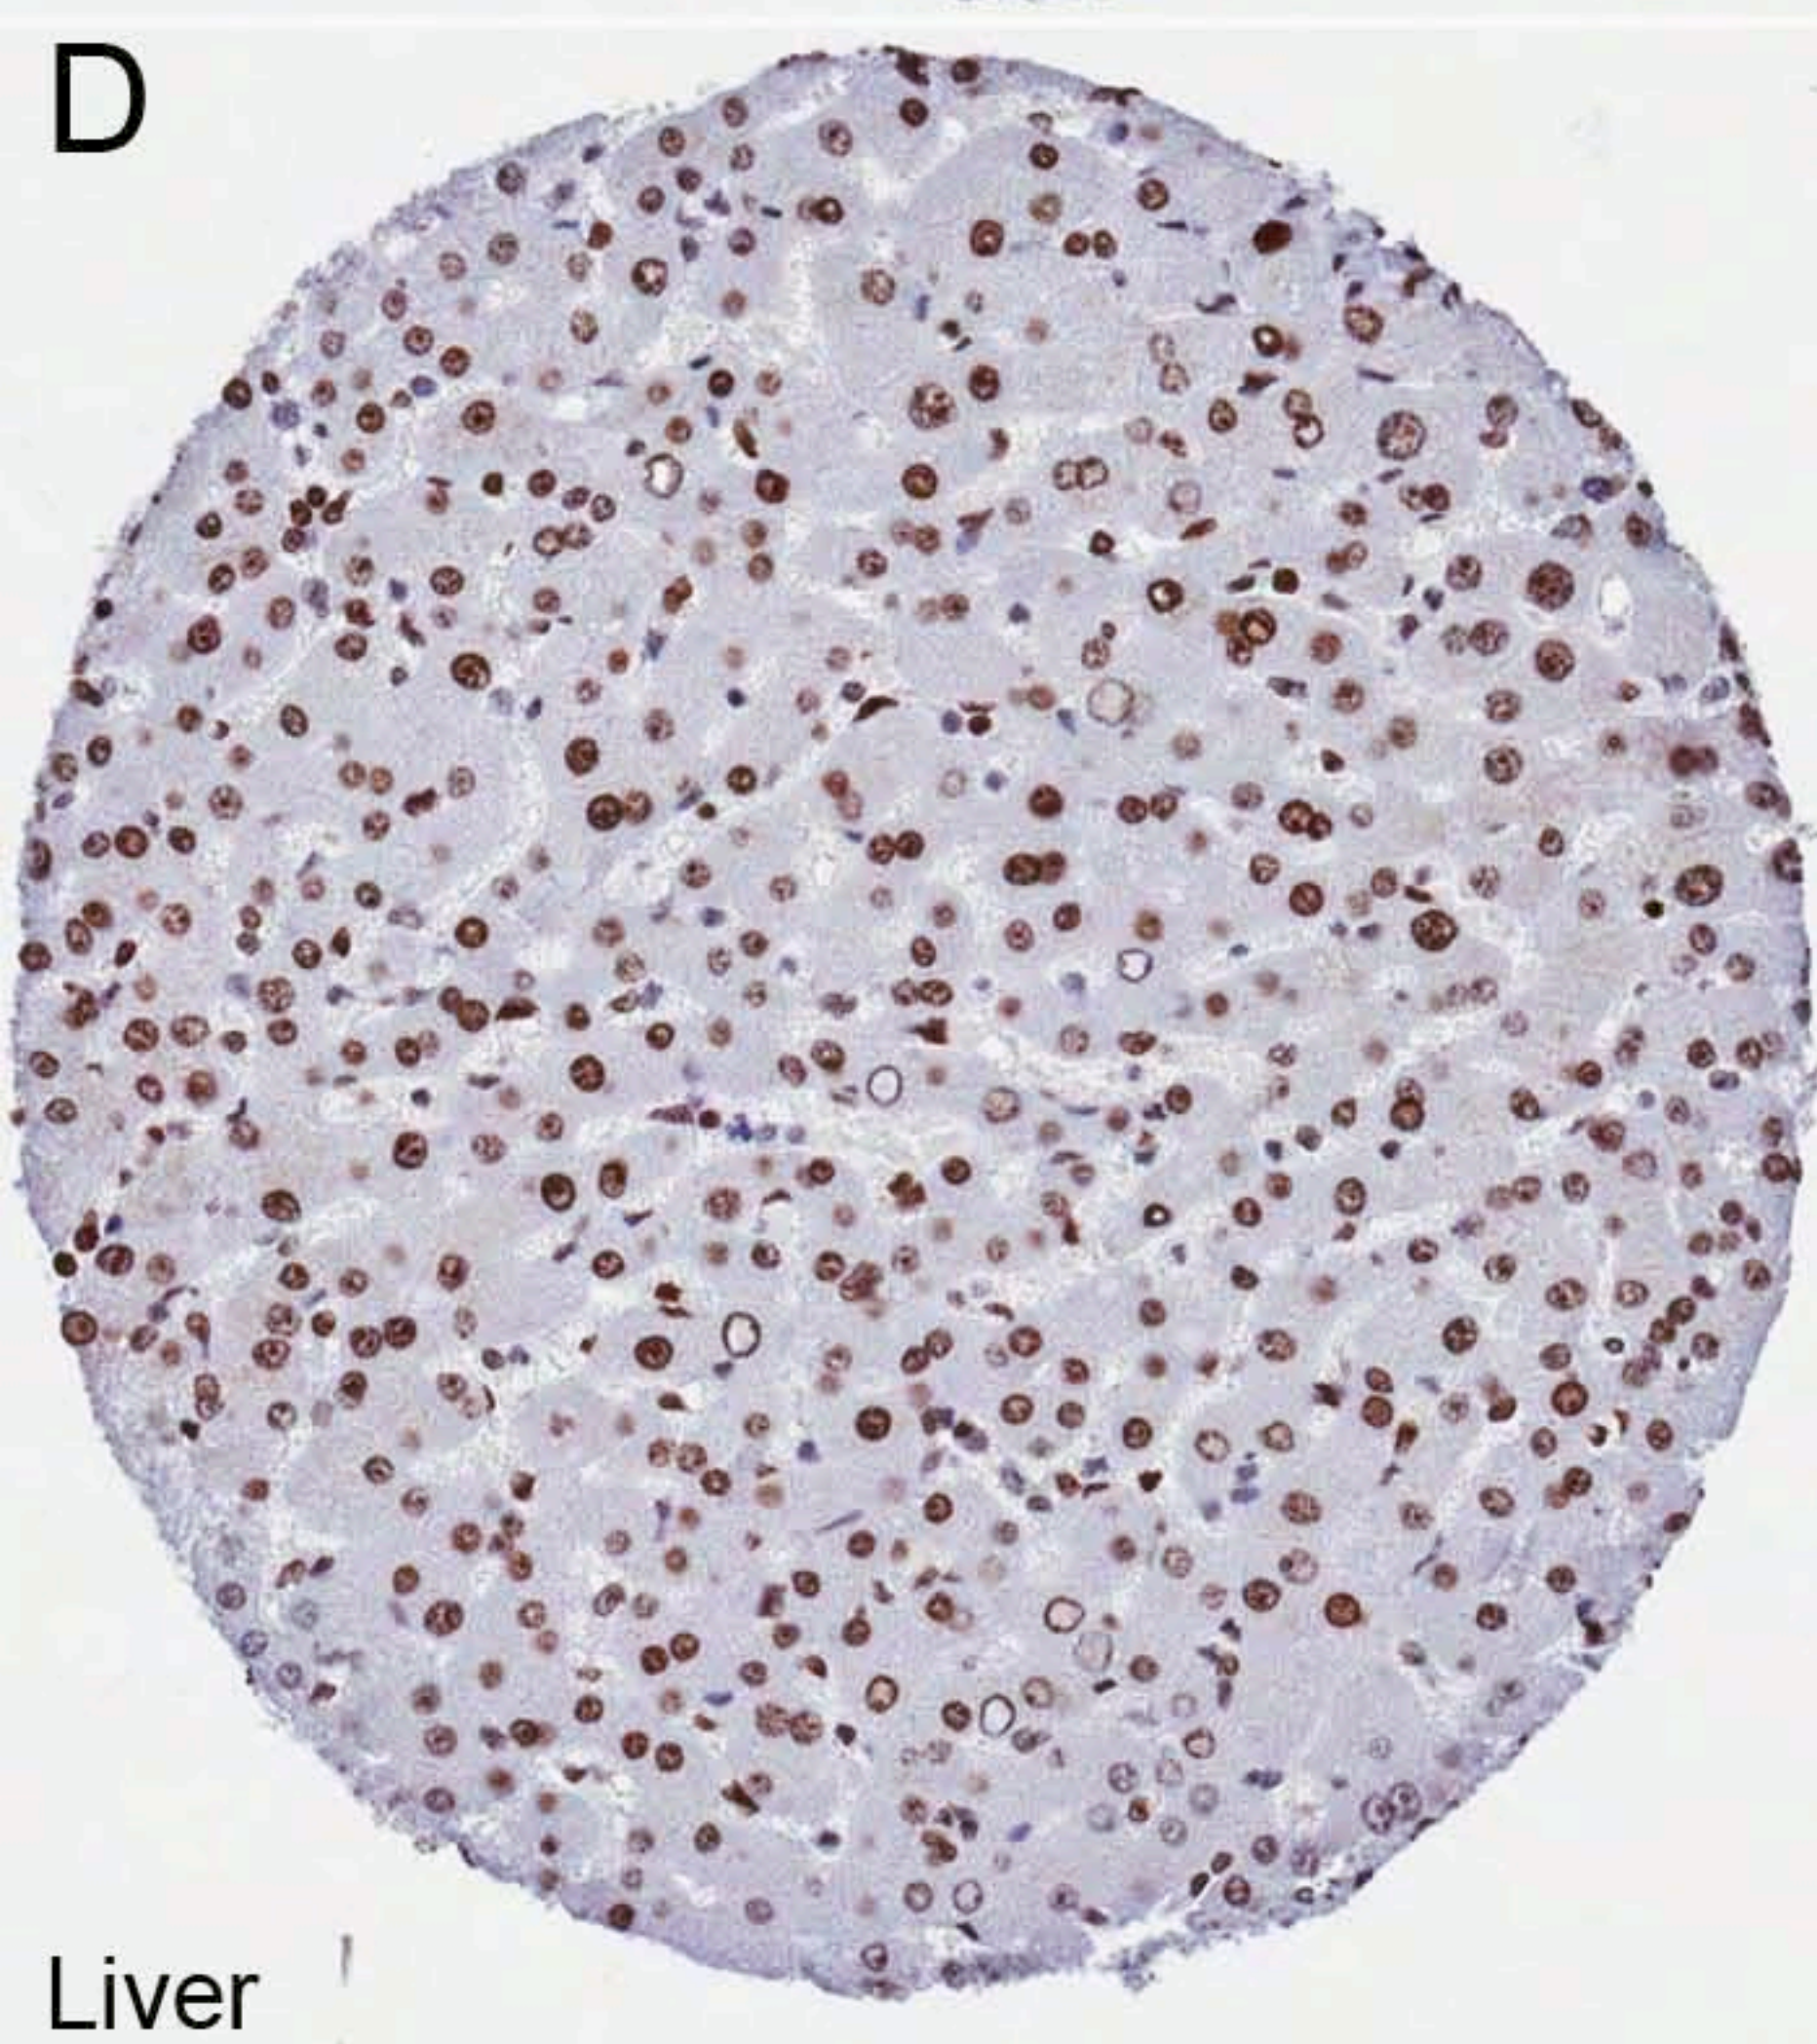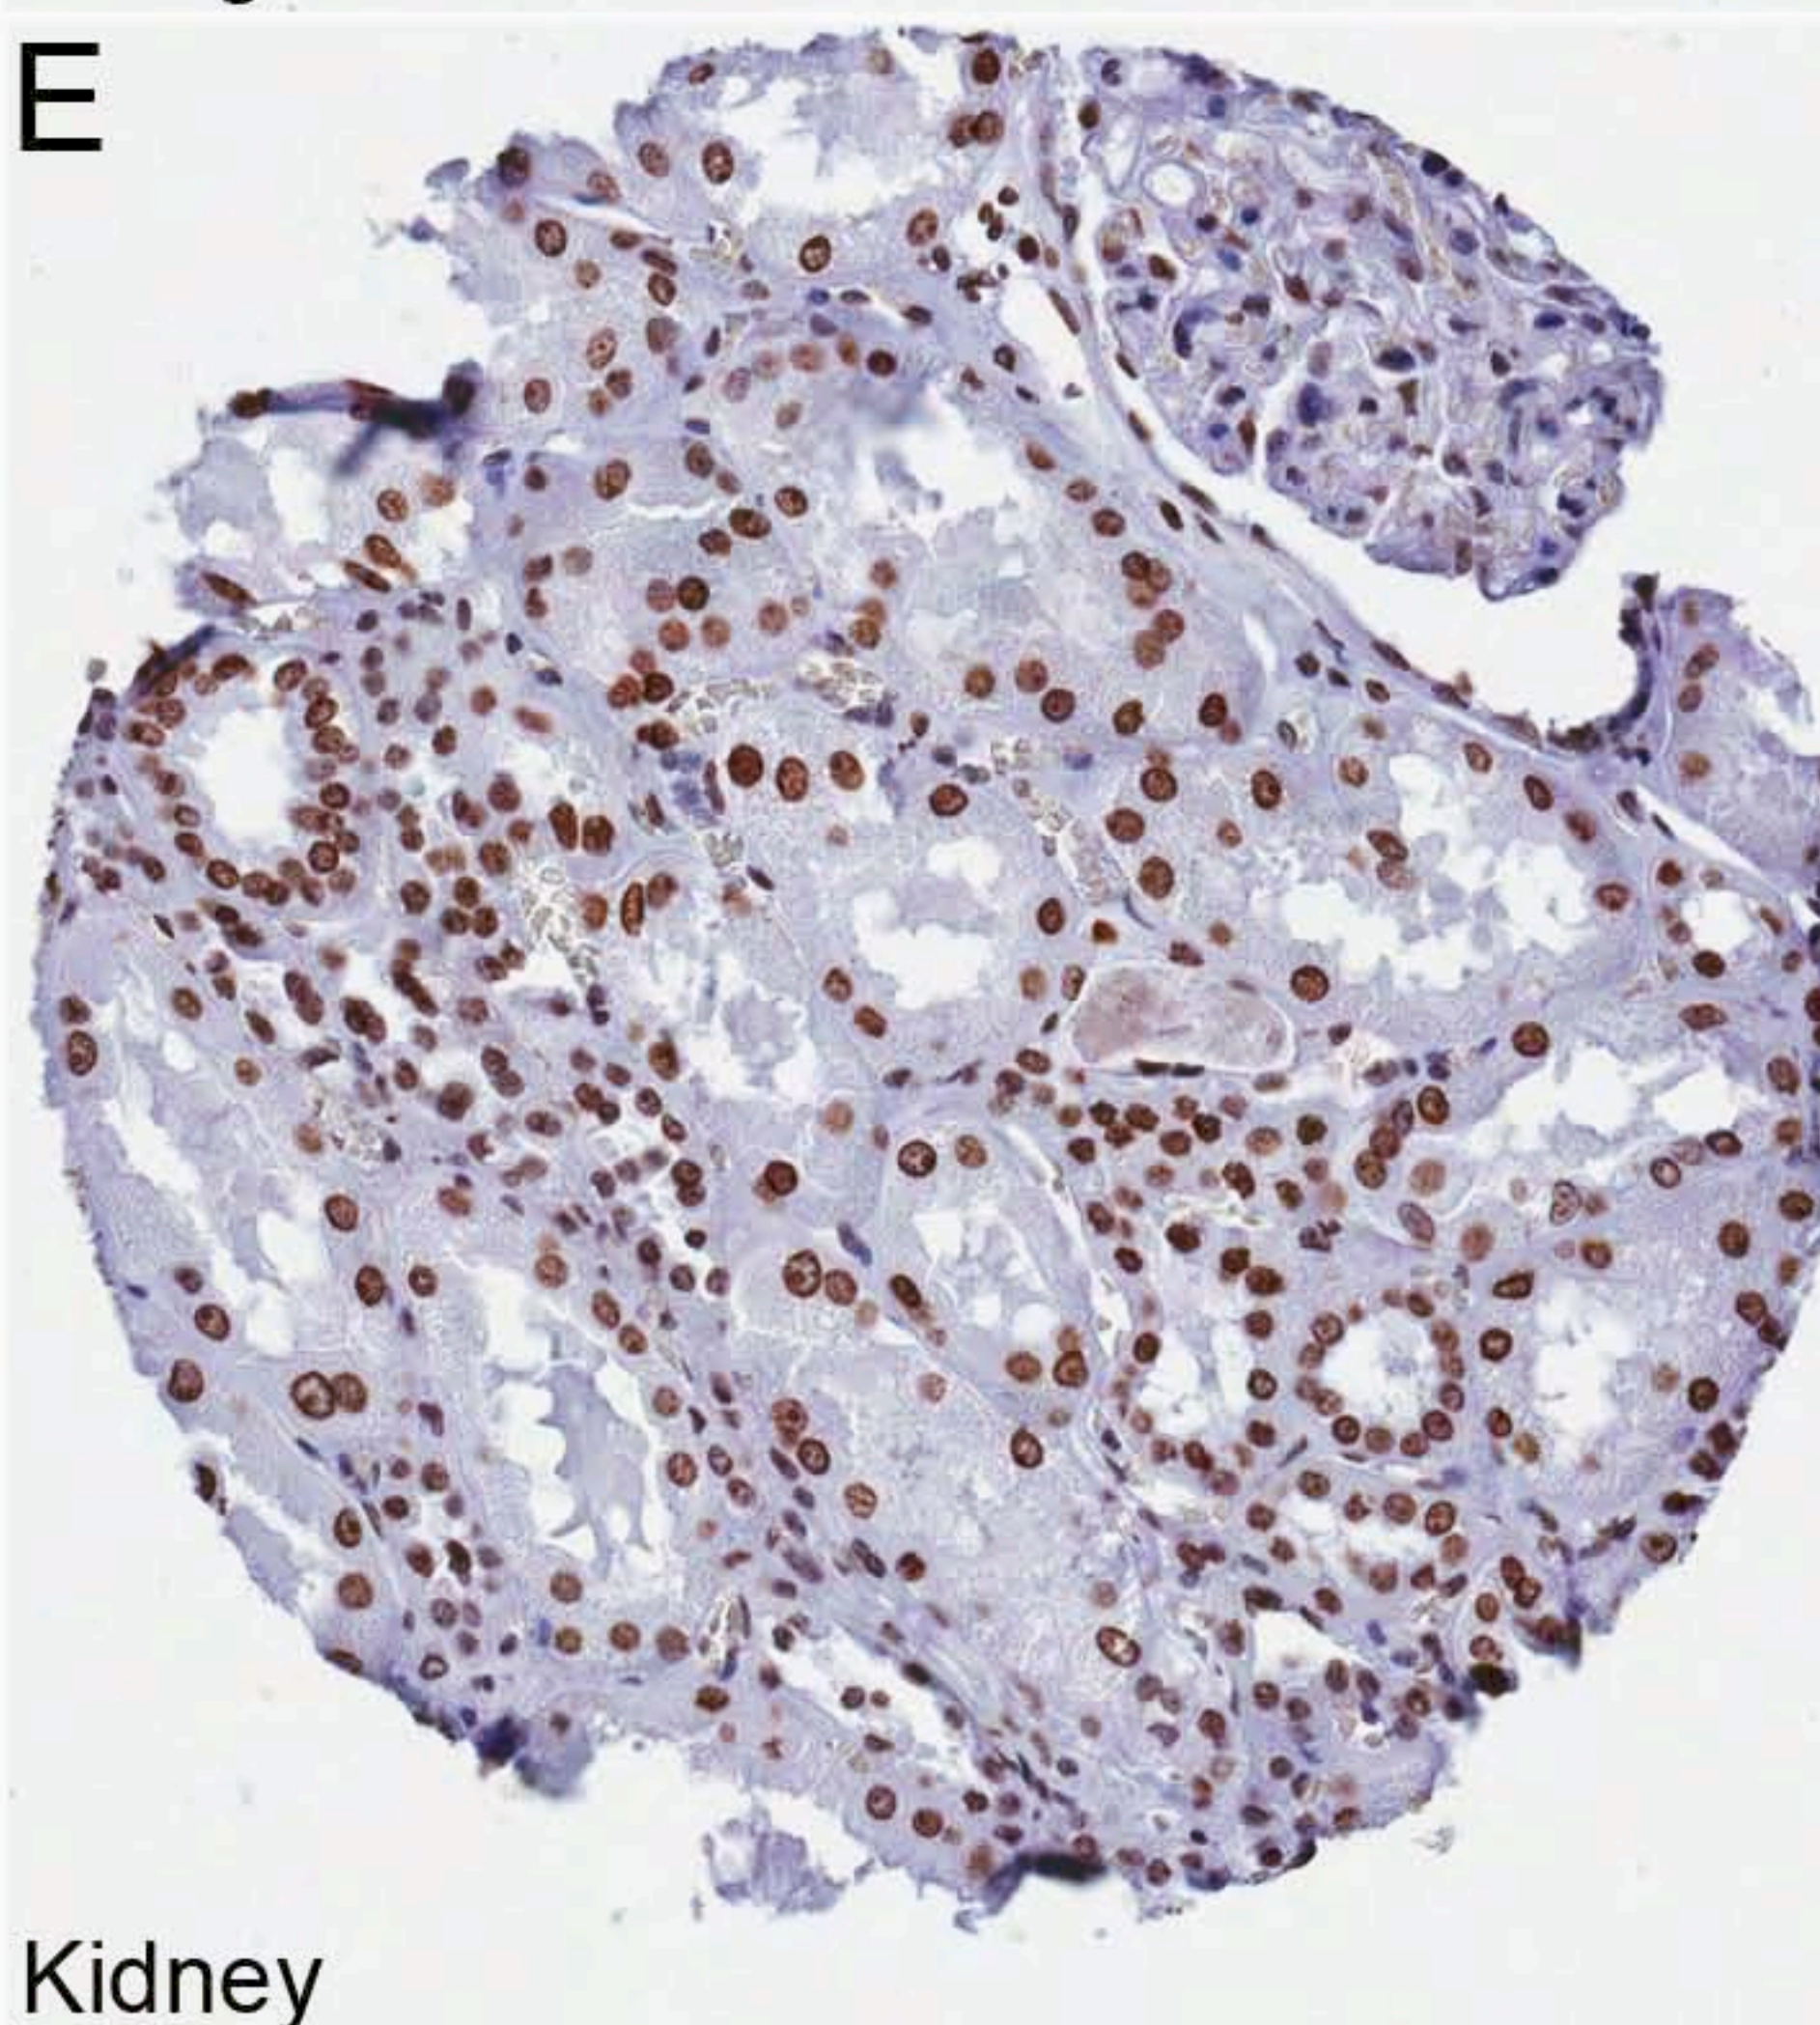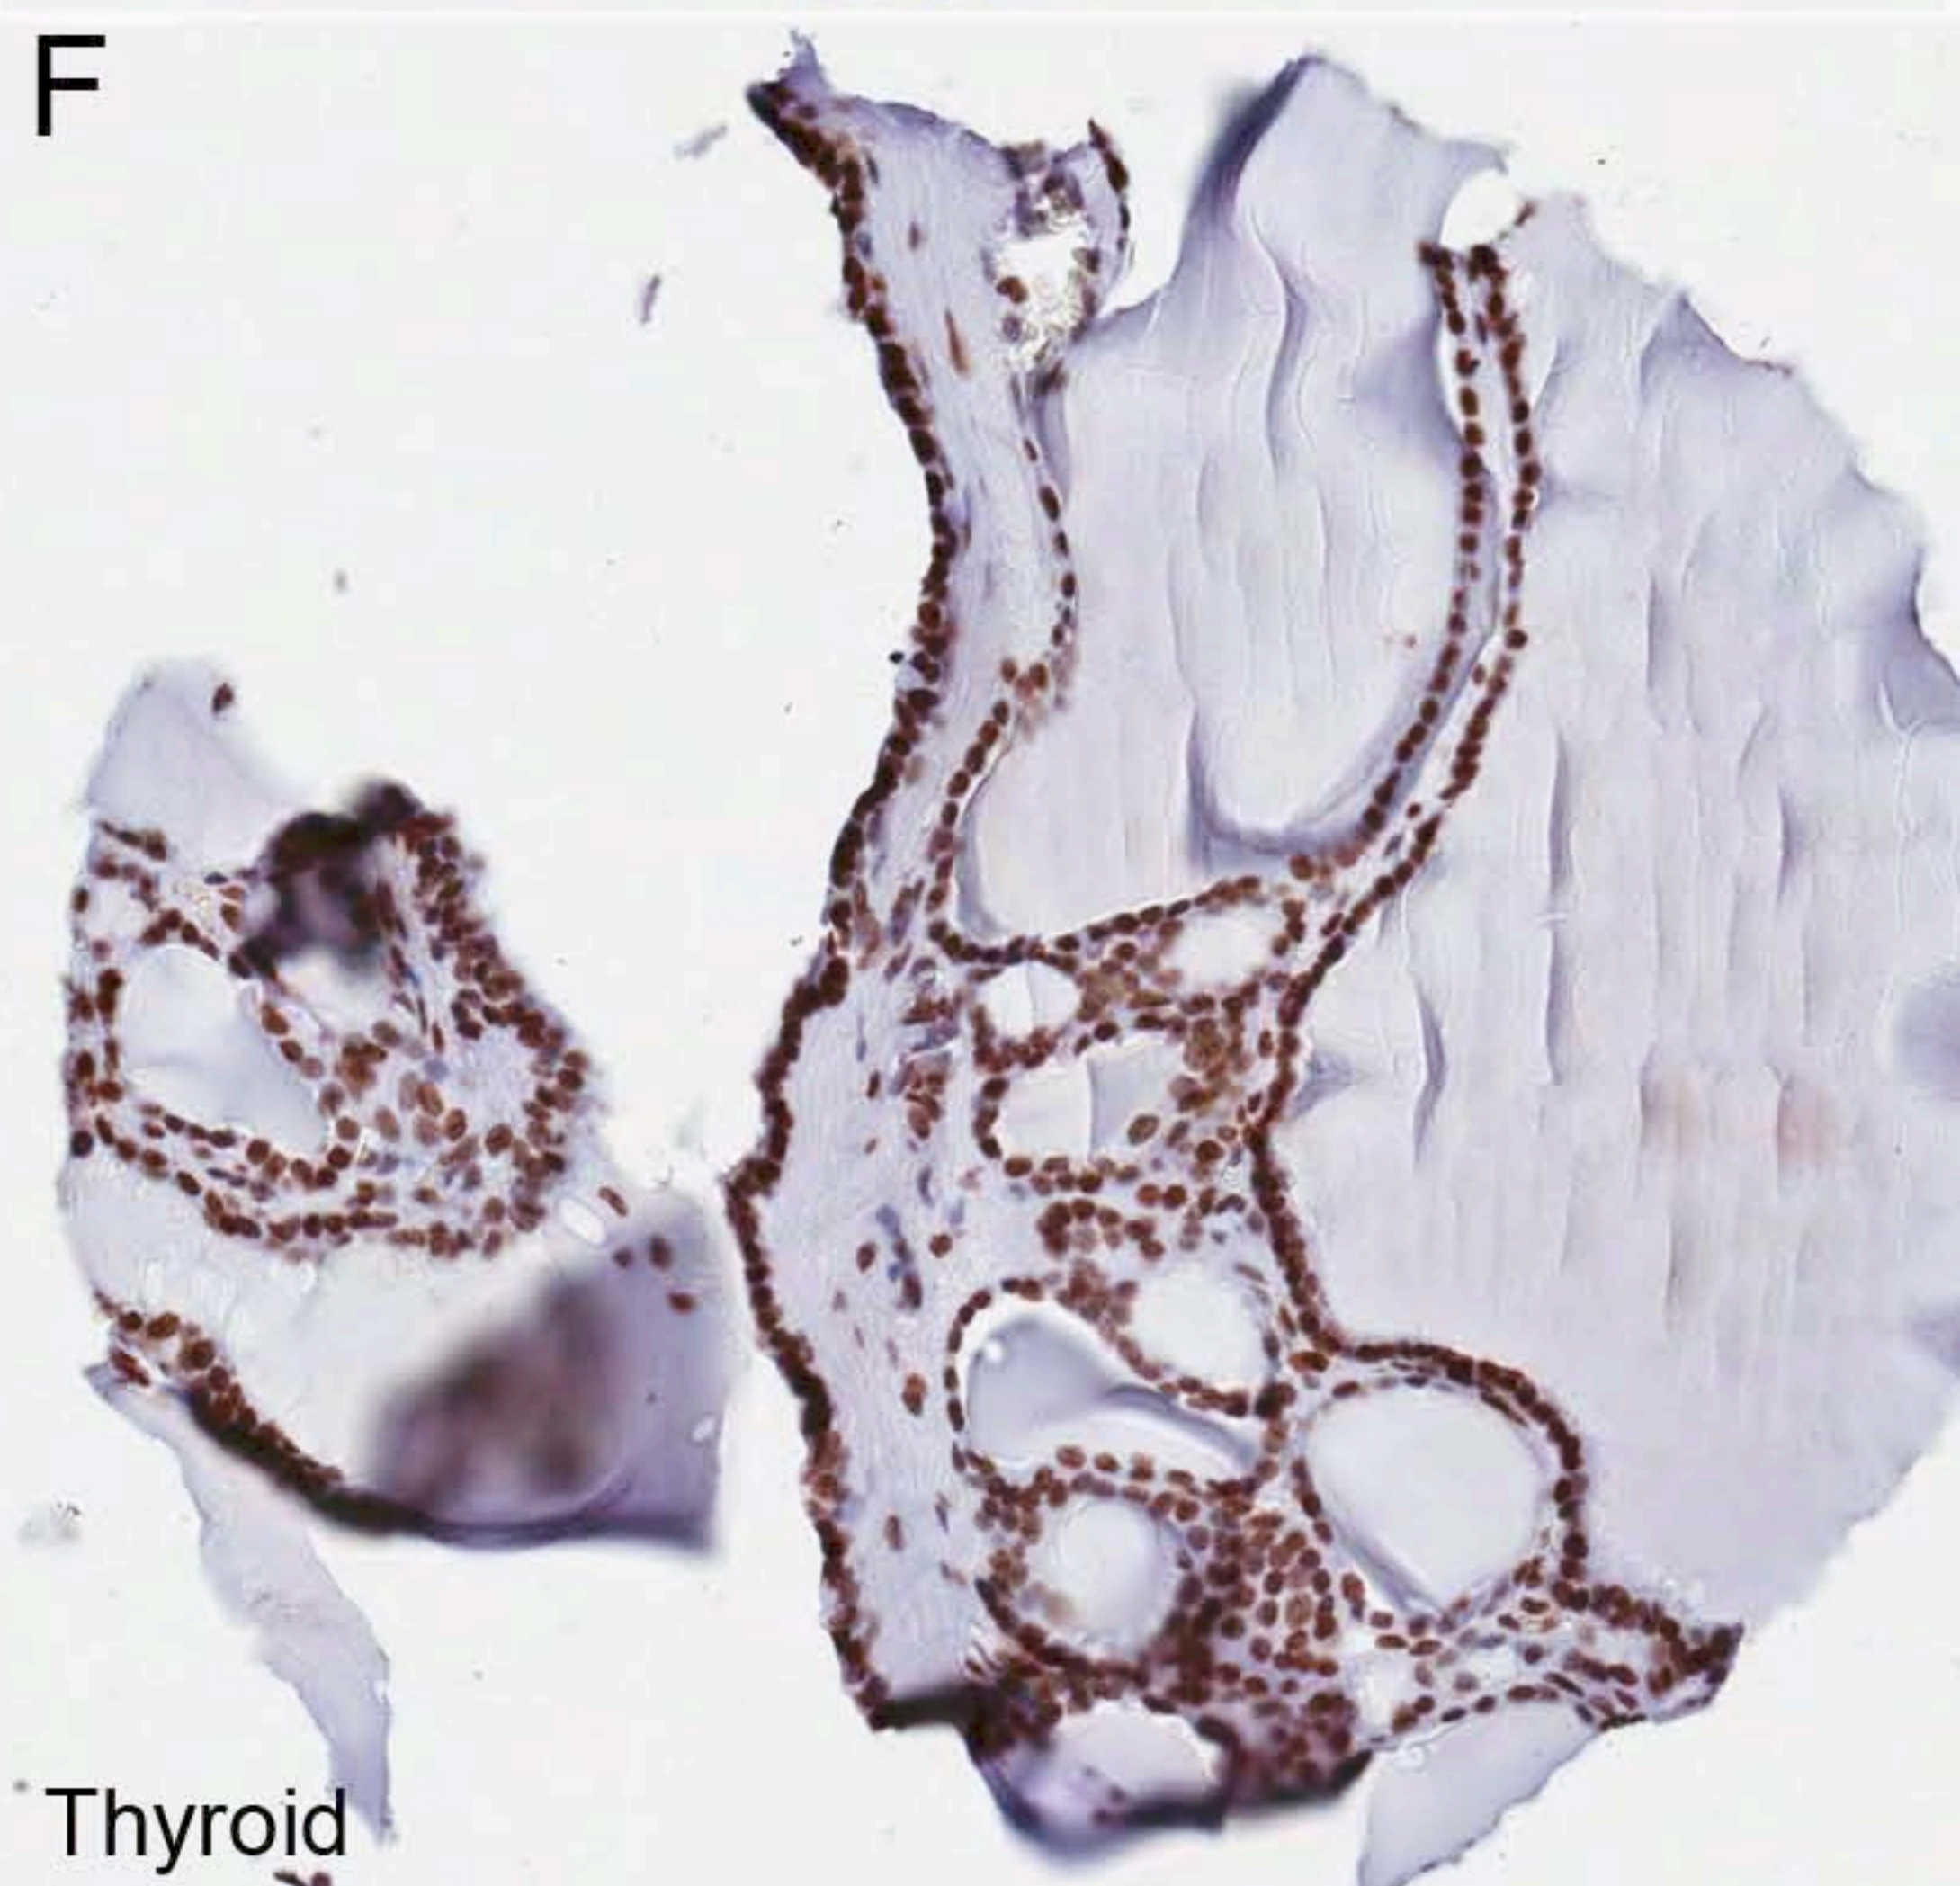

Supplement: mmc2.pdf [file mmc2.pdf]

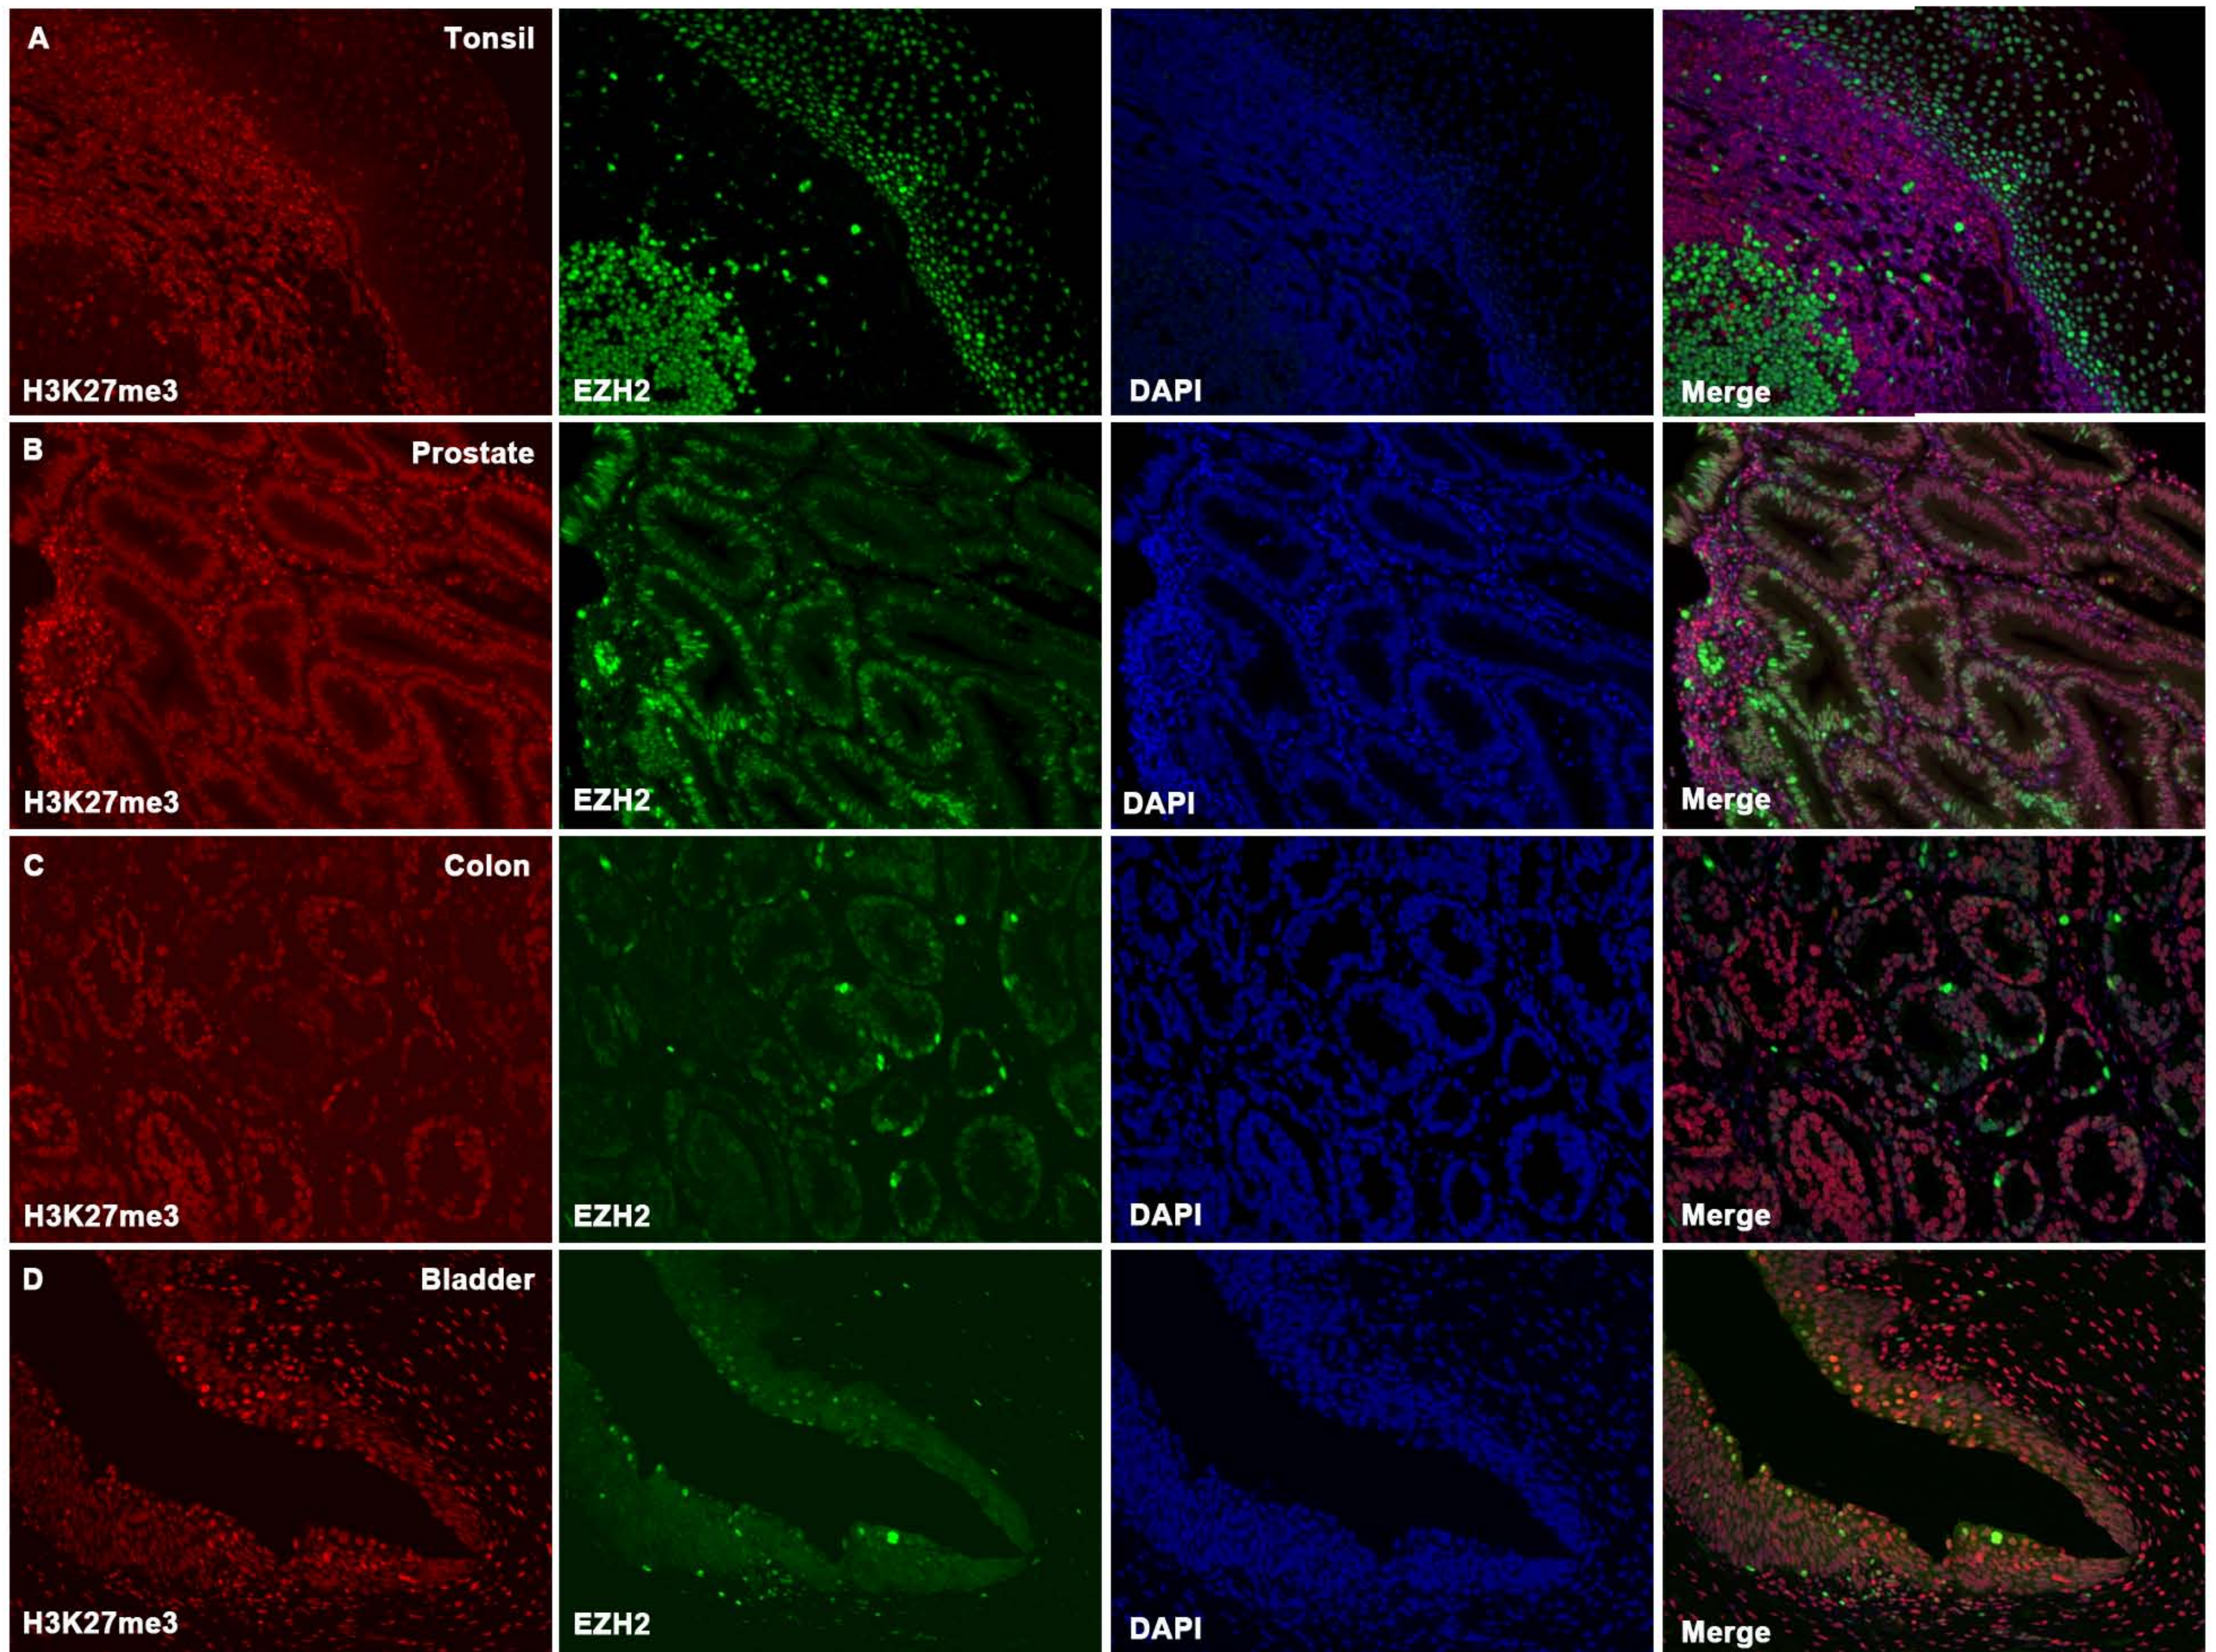

Supplement: mmc3.pdf [file mmc3.pdf]

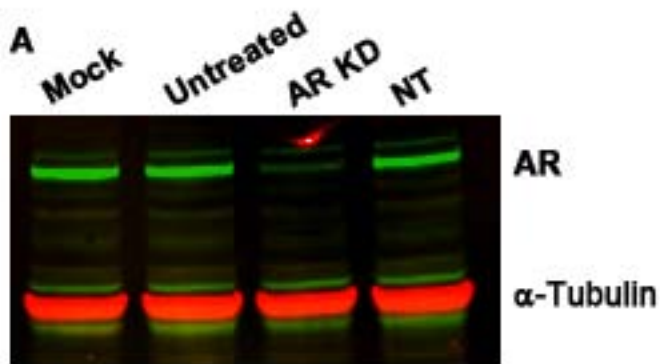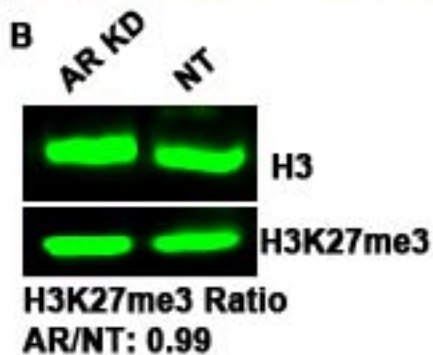

Supplement: mmc4.pdf [file mmc4.pdf]

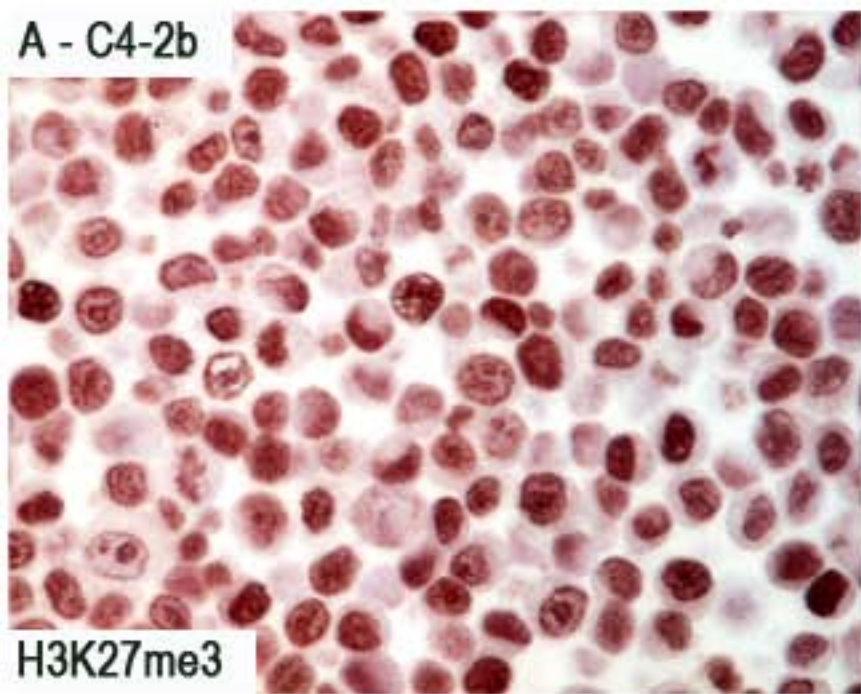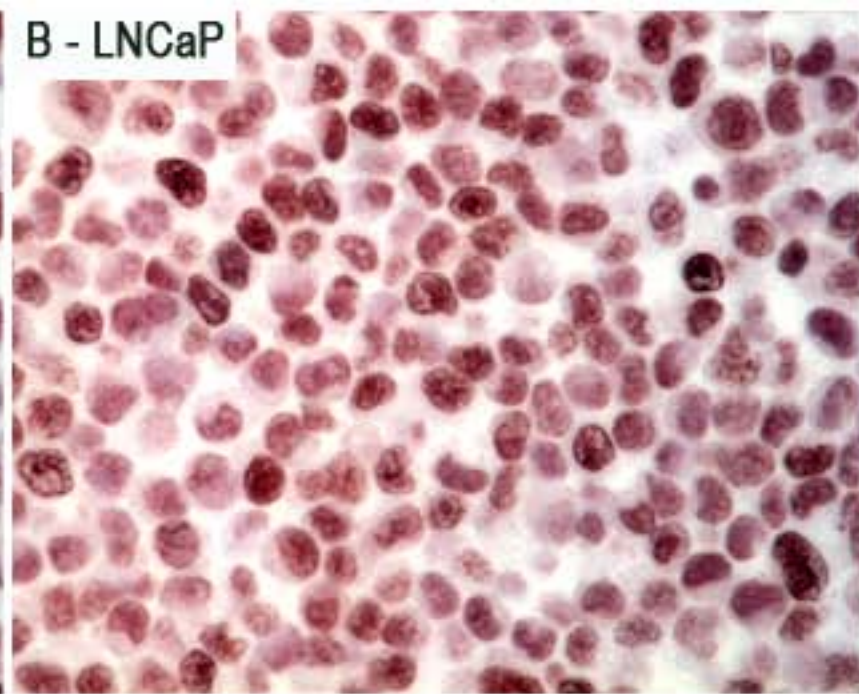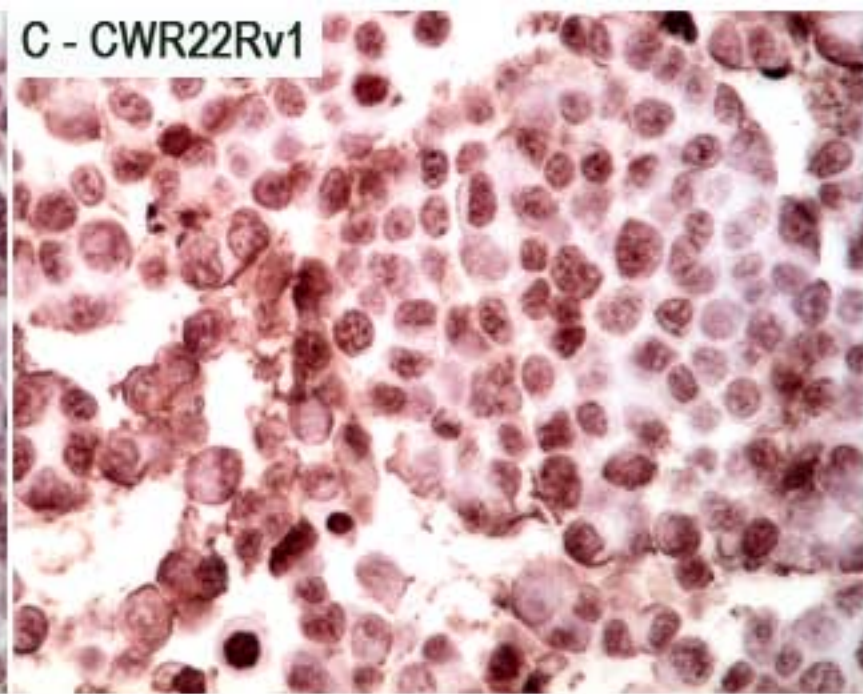

Supplement: mmc5.pdf [file mmc5.pdf]
